# Supplementary material
Source: PubMed Central journal article supplement (PMC3738826)
Supplement: mmc1.pdf [file mmc1.pdf]

American Journal of Human Genetics, Volume 93

## Supplemental Data

### Identification of Multiple Genetic

### Susceptibility Loci in Takayasu Arteritis

Güher Saruhan-Direskeneli, Travis Hughes, Kenan Aksu, Gokhan Keser, Patrick Coit, Sibel Z. Aydin, Fatma Alibaz-Oner, Sevil Kamali, Murat Inanc, Simon Carette, Gary S. Hoffman, Servet Akar, Fatos Onen, Nurullah Akkoc, Nader A. Khalidi, Curry Koenig, Omer Karadag, Sedat Kiraz, Carol A. Langford, Carol A. McAlear, Zeynep Ozbalkan, Askin Ates, Yasar Karaaslan, Kathleen Maksimowicz-McKinnon, Paul A. Monach, Hüseyin TE Ozer, Emire Seyahi, Izzet Fresko, Ayse Cefle, Philip Seo, Kenneth J. Warrington, Mehmet A. Ozturk, Steven R. Ytterberg, Veli Cobankara, A. Mesut Onat, Joel M. Guthridge, Judith A. James, Ercan Tunc, Nurşen Duzgun, Muge Bıçakçıl, Sibel P. Yentür, Peter A. Merkel, Haner Direskeneli, and Amr H. Sawalha

Figure S1: Regional plots showing genetic association results in the Turkish cohort in the *HLA-B/MICA* locus (A), and the *HLA-DQB1/HLA-DRB1* locus (B). Genotyped and imputed variants are depicted with diamond-shaped symbols and circles, respectively. The colors represent  $r^2$  values with the index SNP in each locus (white,  $r^2 < 0.2$ ; yellow,  $r^2 \geq 0.2-0.5$ ; orange,  $r^2 \geq 0.5-0.8$ ; red,  $r^2 \geq 0.8$ ).

A

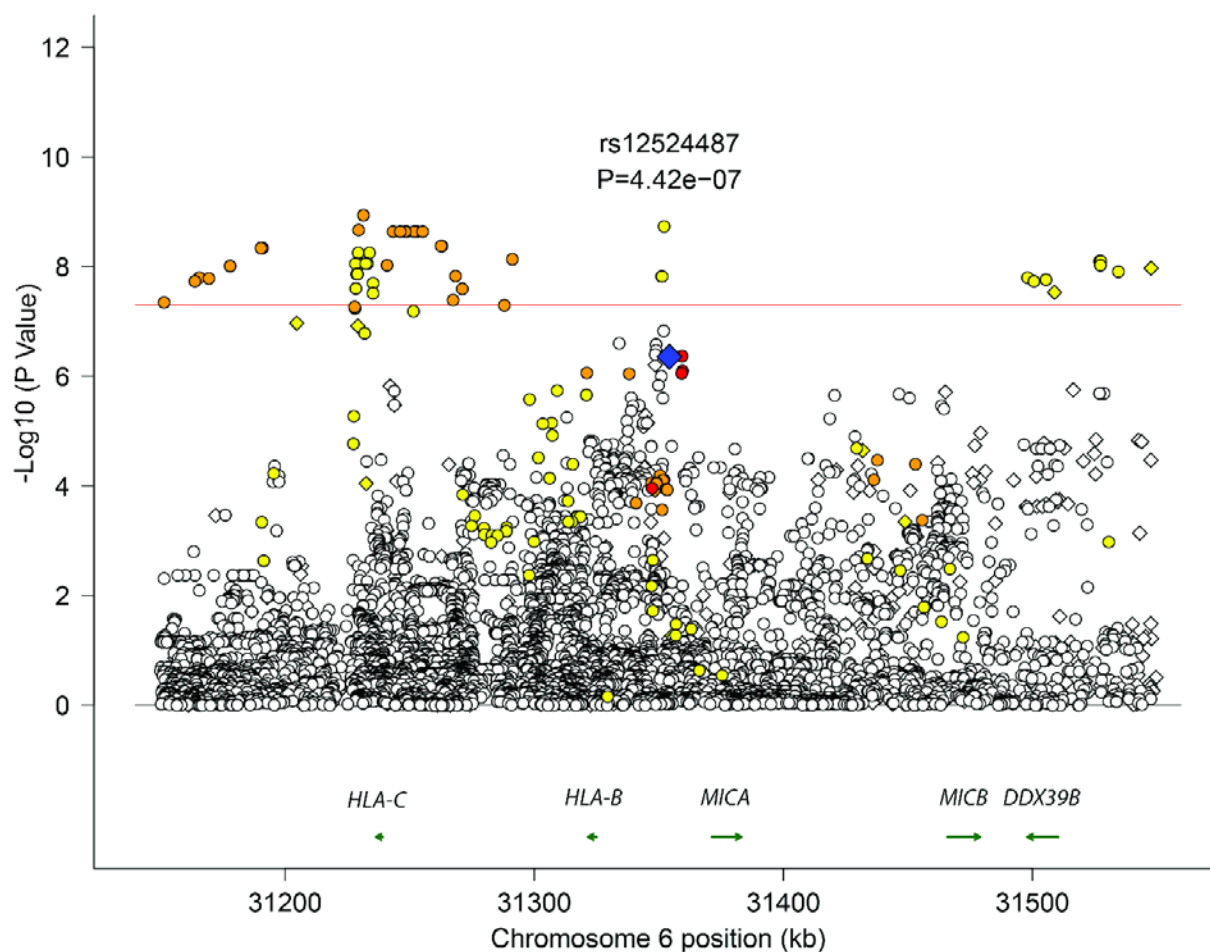

**B**

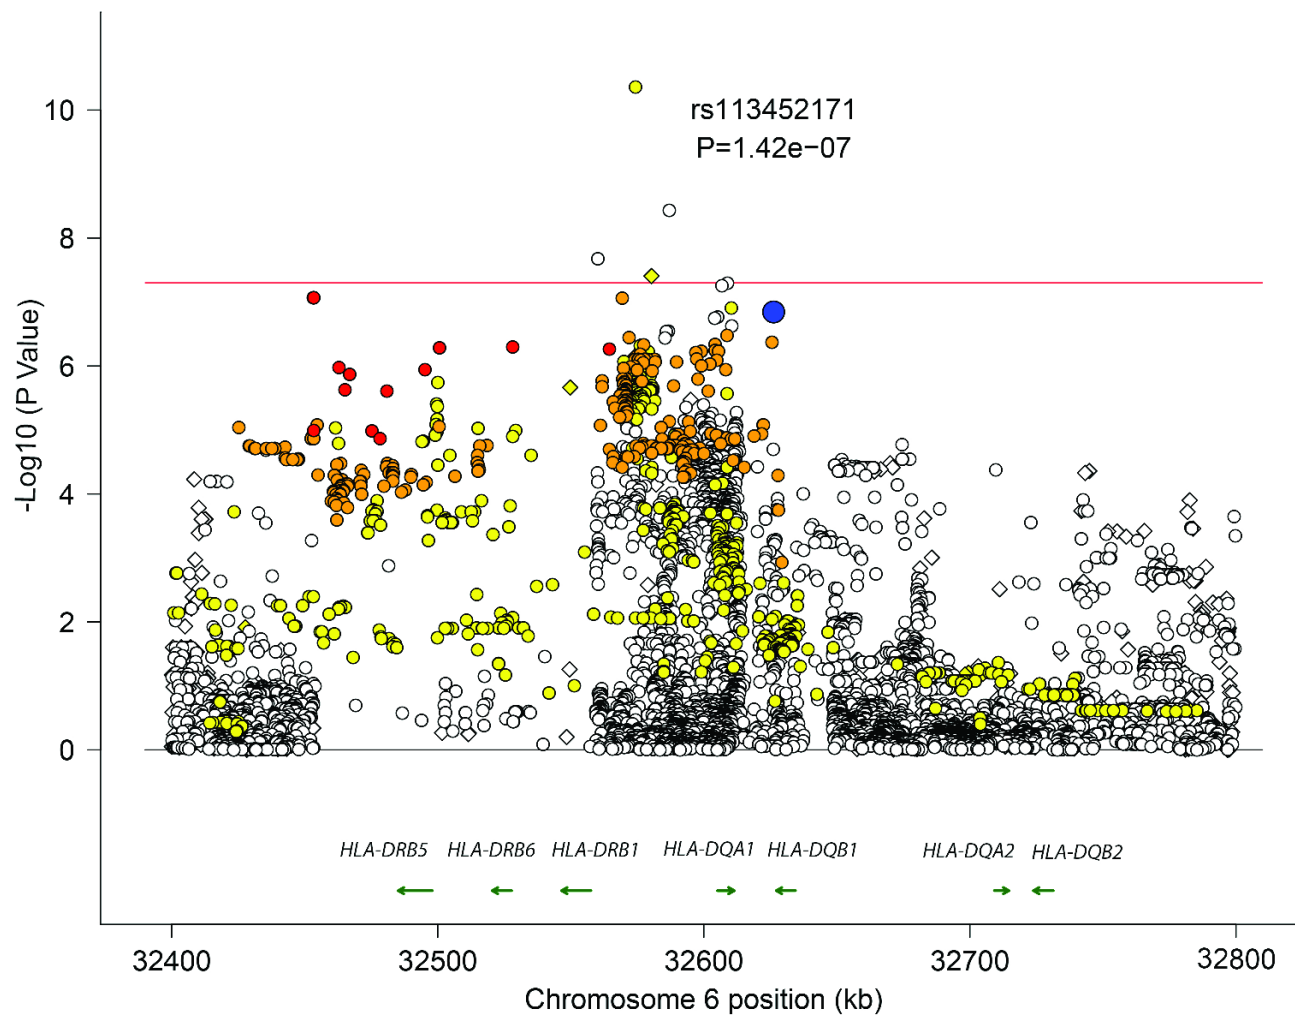

Figure S2: Regional plots showing genetic association results in the European-American cohort in the *HLA-B/MICA* locus (A), and the *HLA-DQB1/HLA-DRB1* locus (B). Genotyped and imputed variants are depicted with diamond-shaped symbols and circles, respectively. The colors represent  $r^2$  values with the index SNP in each locus (white,  $r^2 < 0.2$ ; yellow,  $r^2 \geq 0.2-0.5$ ; orange,  $r^2 \geq 0.5-0.8$ ; red,  $r^2 \geq 0.8$ ).

A

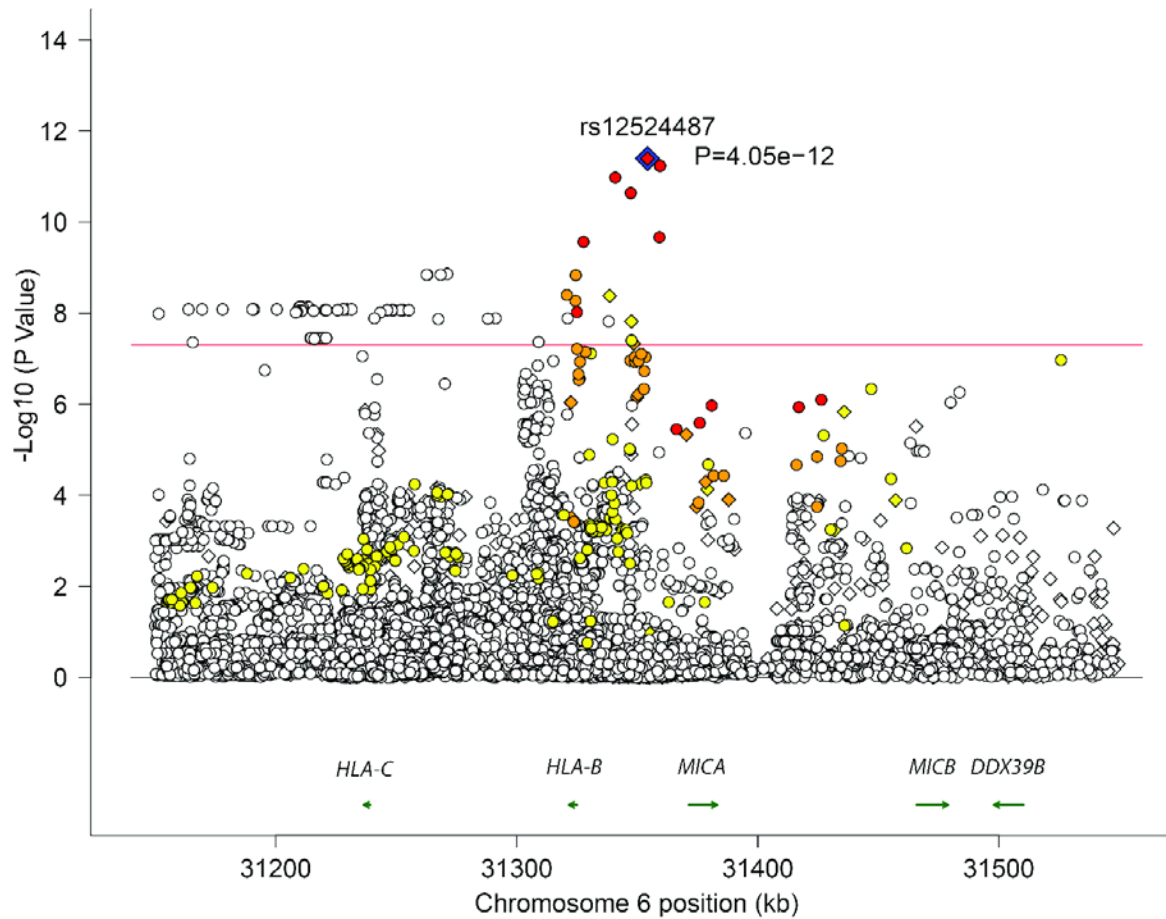

**B**

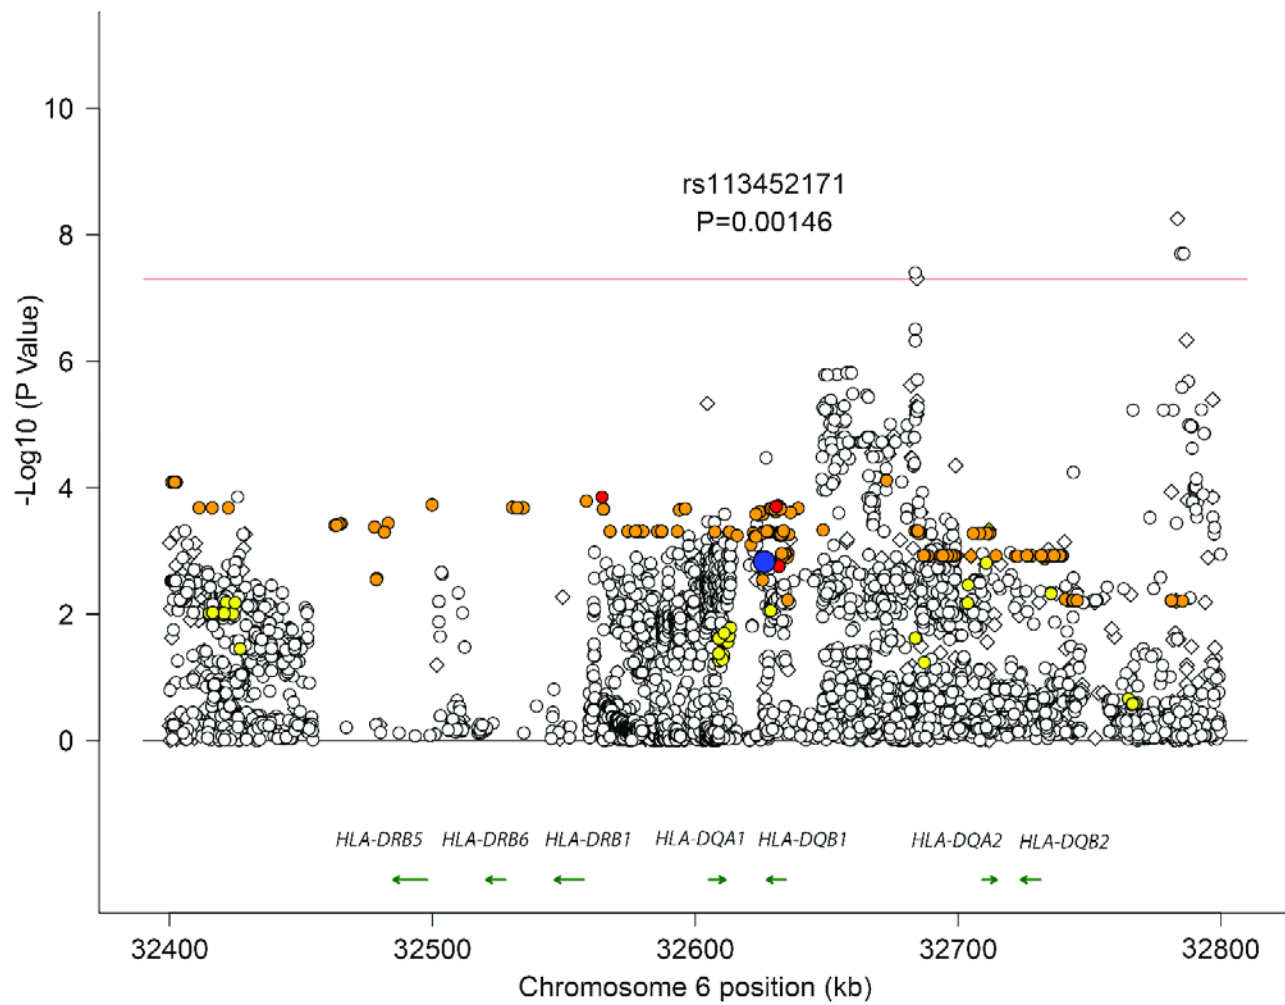

Figure S3: The Takayasu's arteritis associated variant in the *FCGR2A/FCGR3A* locus is associated with allele-specific expression difference in *FCGR2A*. The disease-associated allele in rs2099684 increases *FCGR2A* mRNA expression in lymphoblastoid cells ( $P= 3 \times 10^{-4}$ ).

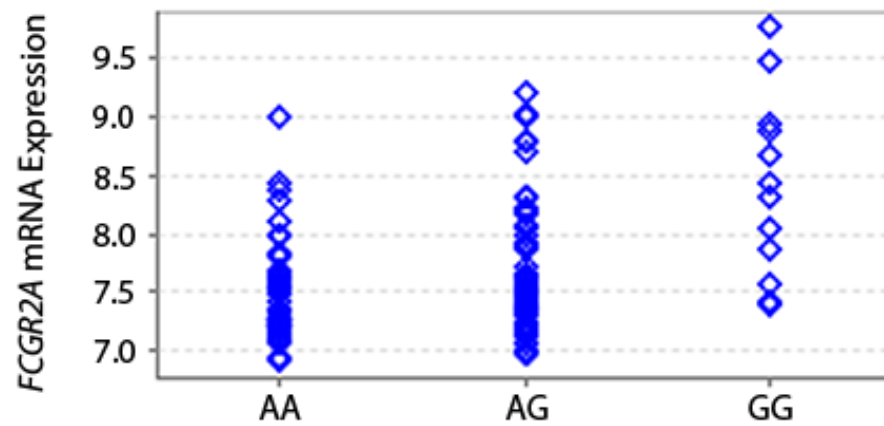

**Figure S4: Genetic association results in chromosome 21q22 downstream of *PSMG1* in Takayasu's arteritis. Panel A shows the association results from the meta-analysis, while Panels B and C show the association results in the Turkish and the European-American cohorts, respectively. The red line represents the genome-wide level of significance ( $P= 5 \times 10^{-8}$ ). Genotyped and imputed variants are shown in diamond-shaped symbols and circles, respectively. The colors represent  $r^2$  values with the index SNP in each locus (white,  $r^2 < 0.2$ ; yellow,  $r^2 \geq 0.2-0.5$ ; orange,  $r^2 \geq 0.5-0.8$ ; red,  $r^2 \geq 0.8$ ).**

**A**

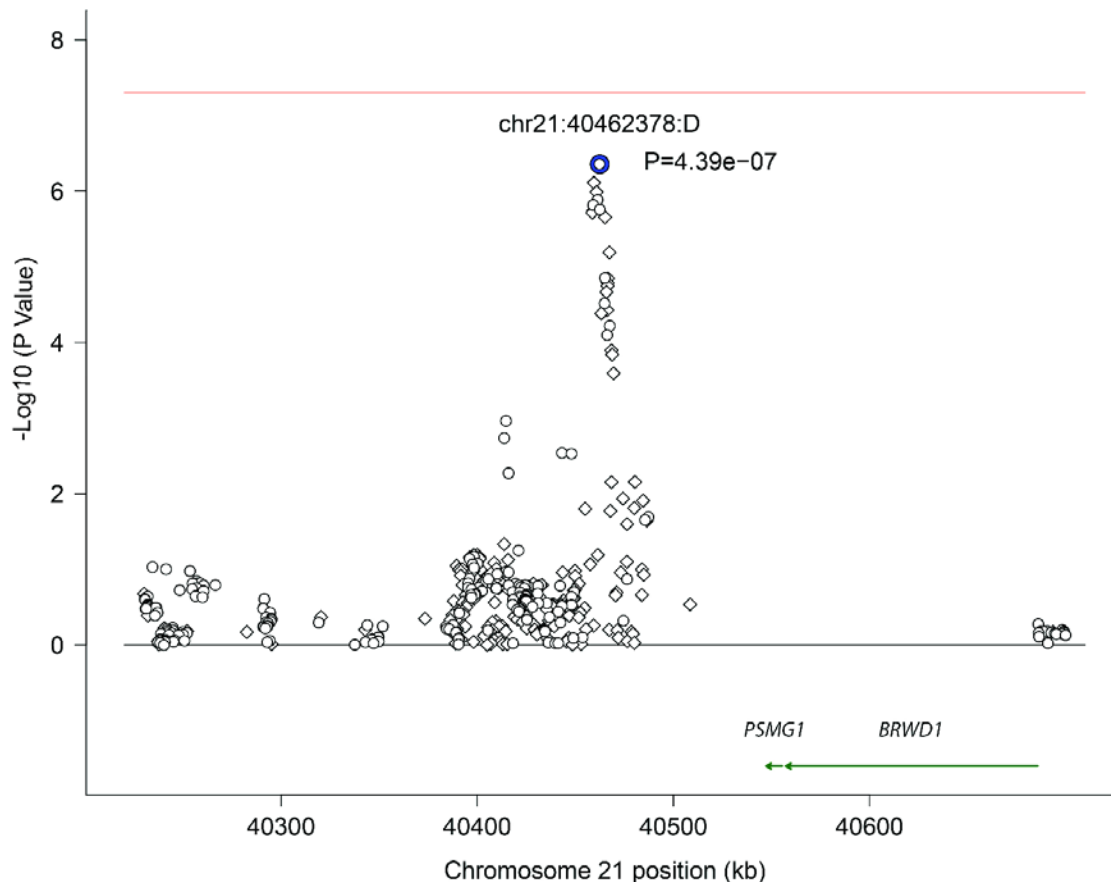

**B**

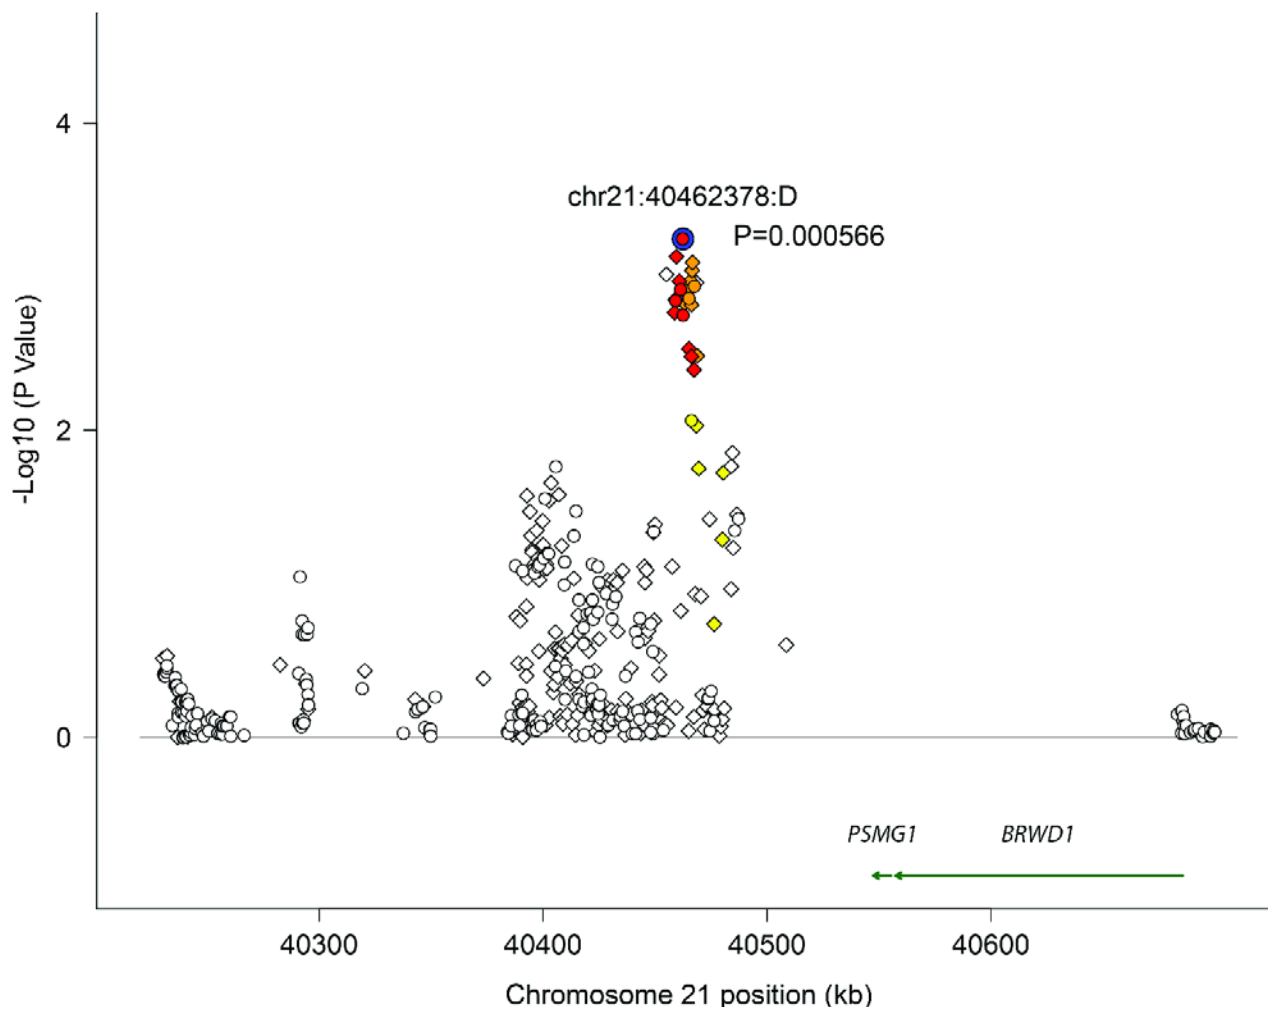



C

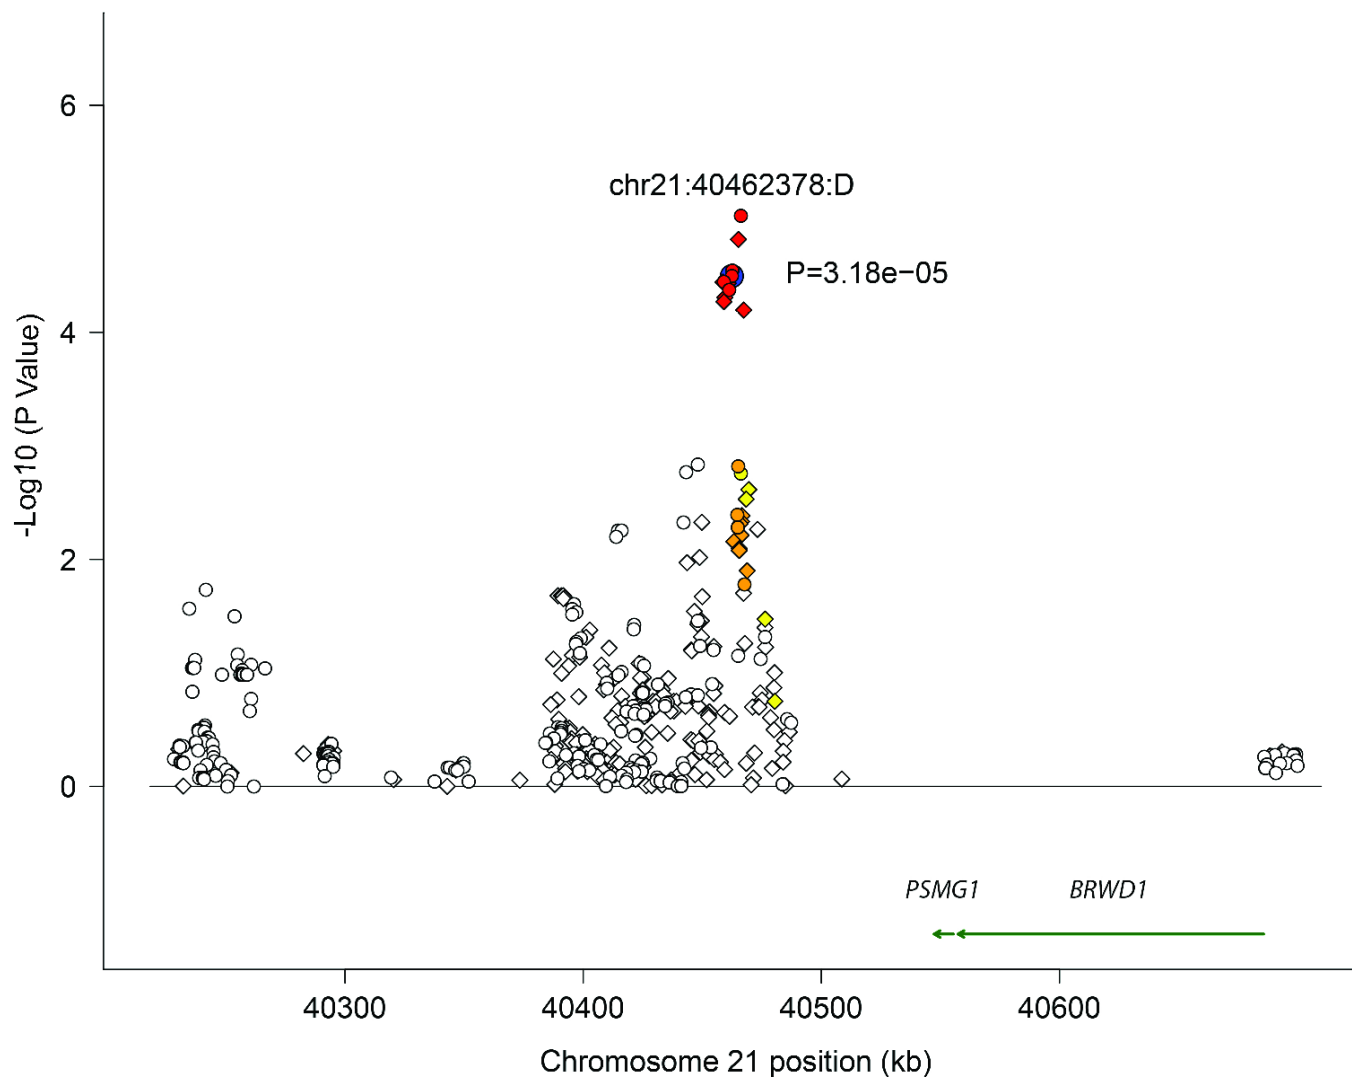

**Figure S5: Genetic association results in the *IL12B* locus on chromosome 5 in Takayasu's arteritis. Panel A shows the association results from the meta-analysis, while Panels B and C show the association results in the Turkish and the European-American cohorts, respectively. Genotyped and imputed variants are shown in diamond-shaped symbols and circles, respectively. The colors represent  $r^2$  values with the index SNP in each locus (white,  $r^2 < 0.2$ ; yellow,  $r^2 \geq 0.2-0.5$ ; orange,  $r^2 \geq 0.5-0.8$ ; red,  $r^2 \geq 0.8$ ).**

**A**

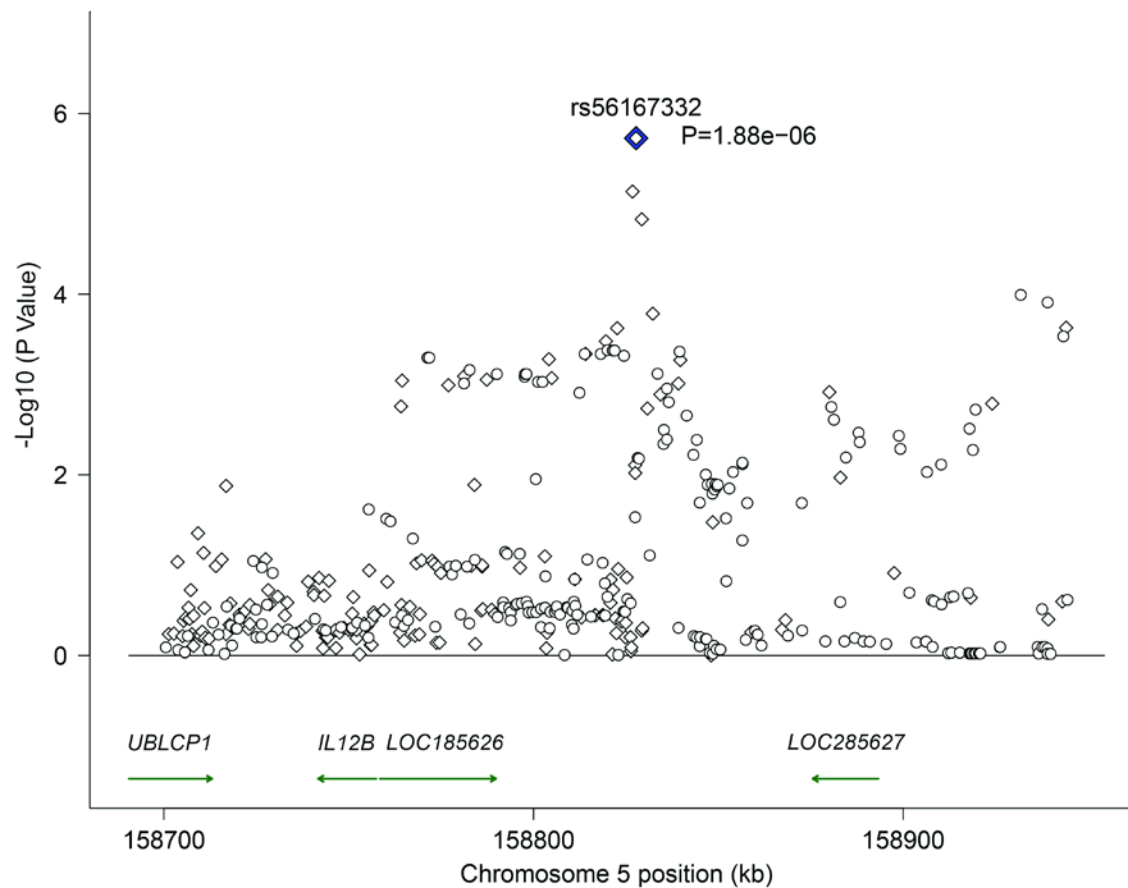

**B**

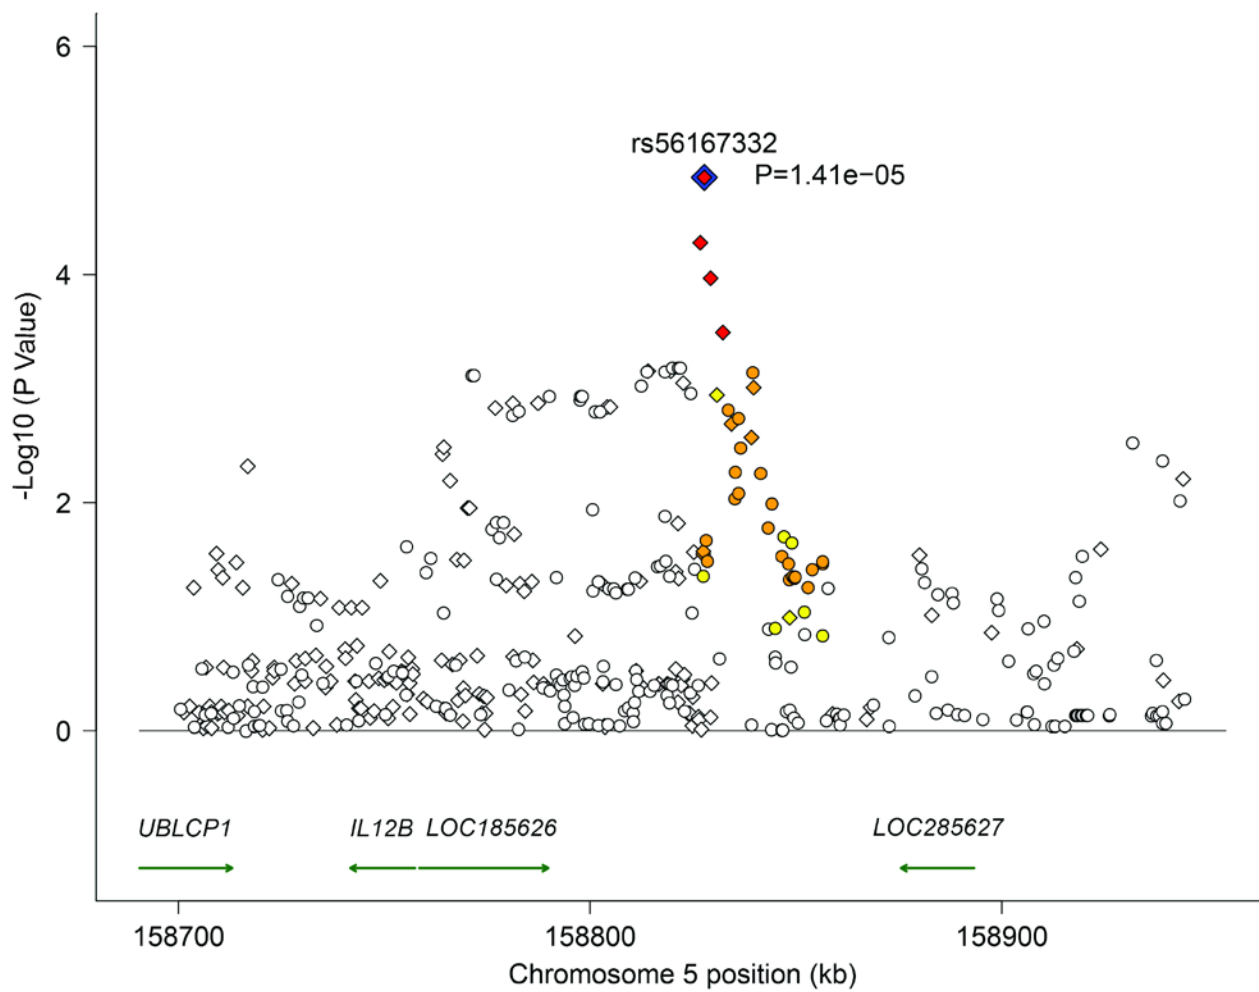

C

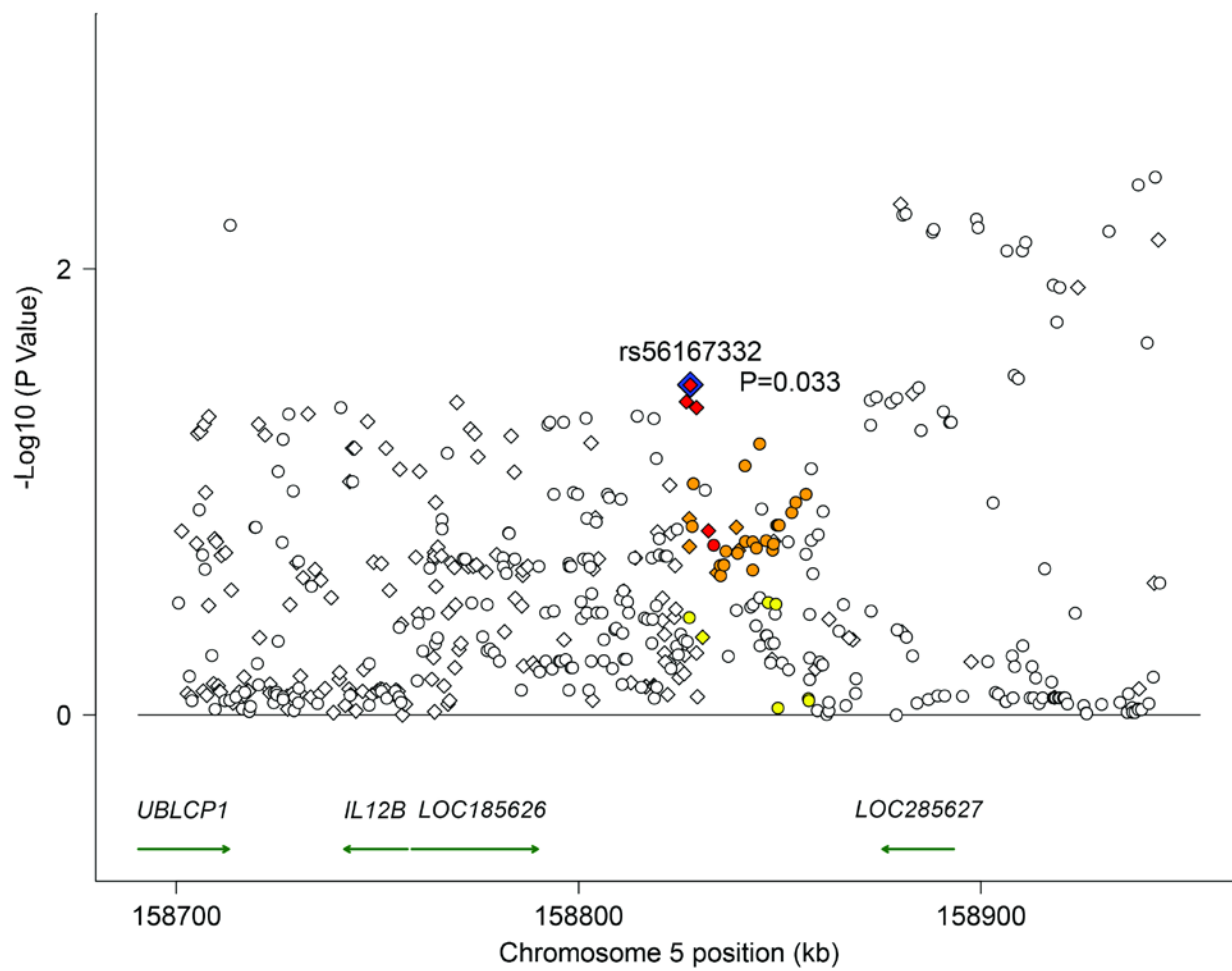

**Table S1: Pair-wise correlation co-efficient values ( $r^2$ ) between the genetic variants detected in the HLA class I and HLA class II regions, in the Turkish and the European-American cohorts.**

**Turkish**

| SNP         | rs12524487 | rs189754752 | rs113452171 |
|-------------|------------|-------------|-------------|
| rs12524487  | 1          | 0.113       | 0.109       |
| rs189754752 | 0.113      | 1           | 0.907       |
| rs113452171 | 0.109      | 0.907       | 1           |

**European-American**

| SNP         | rs12524487 | rs189754752 | rs113452171 |
|-------------|------------|-------------|-------------|
| rs12524487  | 1          | 0.0334      | 0.0314      |
| rs189754752 | 0.0334     | 1           | 1           |
| rs113452171 | 0.0314     | 1           | 1           |

**Table S2: Regression analysis between the three tag SNPs in *HLA-B/MICA* (rs12524487), and *HLA-DQB1/HLA-DRB1* (rs113452171 and rs189754752) confirms that these two genetic effects in the HLA region are independent genetic susceptibility loci for Takayasu's arteritis.**

| SNP         | Covariates  | Turkish            |          | European-American  |          | Meta-Analysis |          |               |
|-------------|-------------|--------------------|----------|--------------------|----------|---------------|----------|---------------|
|             |             | OR (95% CI)        | P        | OR (95% CI)        | P        | OR            | P        | Q statistic P |
| rs12524487  | rs113452171 | 2.21 (1.41 - 3.46) | 0.00055  | 3.90 (2.52 - 6.05) | 1.12E-09 | 2.96          | 1.26E-11 | 0.0752        |
| rs12524487  | rs189754752 | 2.09 (1.32 - 3.31) | 1.60E-03 | 3.74 (2.41 - 5.79) | 3.85E-09 | 2.83          | 1.19E-10 | 0.0734        |
| rs189754752 | rs12524487  | 1.94 (1.36 - 2.77) | 2.40E-04 | 2.82 (1.18 - 6.75) | 2.00E-02 | 2.05          | 1.81E-05 | 0.436         |
| rs189754752 | rs113452171 | 0.71 (0.23 - 2.20) | 5.49E-01 | N/A                | N/A      | N/A           | N/A      | N/A           |
| rs113452171 | rs12524487  | 1.90 (1.37 - 2.63) | 0.00012  | 2.24 (0.94 - 5.36) | 0.07     | 1.95          | 2.28E-05 | 0.729         |
| rs113452171 | rs189754752 | 3.27 (1.10 - 9.78) | 3.37E-02 | N/A                | N/A      | N/A           | N/A      | N/A           |

N/A, conditional analysis not possible due to high linkage disequilibrium.

**Table S3: Genetic association results for variants in linkage disequilibrium ( $r^2 > 0.7$ ) with rs12524487 in the *HLA-B/MICA* locus in the Turkish cohort.**

| SNP<br>(Minor allele)   | Position<br>(HG19) | Gene              | $R^2$ | MAF <sub>Case</sub> | MAF <sub>Control</sub> | <i>P</i> | OR    | 95% CI        | <i>P</i>                            |                                              |
|-------------------------|--------------------|-------------------|-------|---------------------|------------------------|----------|-------|---------------|-------------------------------------|----------------------------------------------|
|                         |                    |                   |       |                     |                        |          |       |               | rs12524487<br>independent<br>of SNP | <i>P</i> SNP<br>independent of<br>rs12524487 |
| chr6:31340919:D (indel) | 31340919           | <i>HLA-B-MICA</i> | 0.765 | 0.120               | 0.064                  | 0.00021  | 1.980 | (1.37 - 2.86) | 0.000420                            | 0.107                                        |
| chr6:31347374:D(indel)  | 31347374           | <i>HLA-B-MICA</i> | 0.807 | 0.114               | 0.059                  | 0.00011  | 2.037 | (1.41 - 2.94) | 0.000903                            | 0.116                                        |
| rs12524487 (T)          | 31354238           | <i>HLA-B-MICA</i> | 1.000 | 0.105               | 0.040                  | 4.42E-07 | 2.786 | (1.85 - 4.21) | N/A                                 | N/A                                          |
| chr6:31359160:D (Indel) | 31359160           | <i>HLA-B-MICA</i> | 1.000 | 0.099               | 0.037                  | 8.93E-07 | 2.837 | (1.84 - 4.37) | N/A                                 | N/A                                          |
| chr6:31359428:D (Indel) | 31359428           | <i>HLA-B-MICA</i> | 0.990 | 0.103               | 0.039                  | 4.33E-07 | 2.846 | (1.87 - 4.33) | N/A                                 | N/A                                          |
| rs141706050 (A)         | 31359449           | <i>HLA-B-MICA</i> | 1.000 | 0.100               | 0.038                  | 8.06E-07 | 2.817 | (1.84 - 4.32) | N/A                                 | N/A                                          |

N/A, conditional analysis not possible due to high linkage disequilibrium.

**Table S4: Genetic association results for variants in linkage disequilibrium ( $r^2 > 0.7$ ) with rs12524487 in the *HLA-B/MICA* locus in the European-American cohort.**

| SNP<br>(Minor allele)   | Position<br>(HG19) | Gene                | R <sup>2</sup> | MAF <sub>Case</sub> | MAF <sub>Control</sub> | P        | OR    | 95% CI        | P rs12524487<br>independent<br>of SNP | P SNP<br>independent<br>of rs12524487 |
|-------------------------|--------------------|---------------------|----------------|---------------------|------------------------|----------|-------|---------------|---------------------------------------|---------------------------------------|
| 1kg_6_30334027          | 30226048           | <i>TRIM26-HLA-L</i> | 0.710          | 0.159               | 0.065                  | 4.83E-06 | 2.717 | (1.75 - 4.23) | 8.91E-07                              | 0.05197                               |
| rs3819294 (T)           | 31322486           | <i>HLA-B</i>        | 0.751          | 0.176               | 0.071                  | 9.15E-07 | 2.780 | (1.82 - 4.24) | 6.45E-06                              | 0.0615                                |
| rs4999717 (T)           | 31324348           | <i>HLA-B</i>        | 0.743          | 0.157               | 0.046                  | 5.35E-09 | 3.844 | (2.38 - 6.22) | 1.88E-05                              | 0.292                                 |
| rs17881210 (T)          | 31324448           | <i>HLA-B</i>        | 0.752          | 0.157               | 0.044                  | 1.46E-09 | 4.052 | (2.50 - 6.57) | 2.21E-05                              | 0.3318                                |
| rs145400941 (A)         | 31324891           | <i>HLA-B</i>        | 0.788          | 0.175               | 0.062                  | 6.15E-08 | 3.190 | (2.06 - 4.95) | 1.44E-05                              | 0.09785                               |
| rs34437781 (T)          | 31324955           | <i>HLA-B</i>        | 0.812          | 0.173               | 0.058                  | 9.42E-09 | 3.423 | (2.20 - 5.32) | 5.83E-06                              | 0.06903                               |
| rs34265426 (A)          | 31325684           | <i>HLA-B-MICA</i>   | 0.781          | 0.171               | 0.064                  | 2.17E-07 | 3.013 | (1.95 - 4.65) | 3.35E-06                              | 0.04232                               |
| rs185381871 (T)         | 31325795           | <i>HLA-B-MICA</i>   | 0.782          | 0.171               | 0.065                  | 2.94E-07 | 2.973 | (1.93 - 4.59) | 3.40E-06                              | 0.04                                  |
| chr6:31326149:D (Indel) | 31326149           | <i>HLA-B-MICA</i>   | 0.728          | 0.183               | 0.071                  | 2.78E-07 | 2.918 | (1.91 - 4.46) | 1.94E-06                              | 0.05423                               |
| rs9405085 (G)           | 31326292           | <i>HLA-B-MICA</i>   | 0.784          | 0.175               | 0.065                  | 1.16E-07 | 3.051 | (1.99 - 4.69) | 3.18E-06                              | 0.04448                               |
| rs9378249 (G)           | 31327701           | <i>HLA-B-MICA</i>   | 0.806          | 0.147               | 0.036                  | 2.71E-10 | 4.570 | (2.74 - 7.61) | 1.89E-06                              | 0.09187                               |
| rs137955370 (T)         | 31328475           | <i>HLA-B-MICA</i>   | 0.782          | 0.175               | 0.064                  | 7.14E-08 | 3.110 | (2.02 - 4.78) | 2.98E-06                              | 0.04708                               |
| rs9366782 (T)           | 31328545           | <i>HLA-B-MICA</i>   | 0.782          | 0.175               | 0.064                  | 7.14E-08 | 3.110 | (2.02 - 4.78) | 2.98E-06                              | 0.04708                               |
| chr6:31340919:D (Indel) | 31340919           | <i>HLA-B-MICA</i>   | 0.914          | 0.211               | 0.064                  | 1.05E-11 | 3.912 | (2.58 - 5.93) | 0.04131                               | 0.4583                                |
| chr6:31347374:D (Indel) | 31347374           | <i>HLA-B-MICA</i>   | 0.920          | 0.217               | 0.070                  | 2.30E-11 | 3.668 | (2.46 - 5.48) | 0.07358                               | 0.5675                                |
| rs115960365 (T)         | 31349030           | <i>HLA-B-MICA</i>   | 0.703          | 0.226               | 0.098                  | 1.16E-07 | 2.700 | (1.85 - 3.94) | 0.001161                              | 0.276                                 |
| rs115310440 (A)         | 31349120           | <i>HLA-B-MICA</i>   | 0.708          | 0.226               | 0.097                  | 9.28E-08 | 2.723 | (1.86 - 3.98) | 0.001347                              | 0.2946                                |
| rs116636316 (G)         | 31350463           | <i>HLA-B-MICA</i>   | 0.711          | 0.224               | 0.096                  | 1.12E-07 | 2.728 | (1.86 - 4.00) | 0.001661                              | 0.3142                                |
| rs114717560 (C)         | 31351675           | <i>HLA-B-MICA</i>   | 0.731          | 0.225               | 0.093                  | 7.87E-08 | 2.841 | (1.92 - 4.21) | 0.003987                              | 0.3245                                |
| chr6:31352722:I (Indel) | 31352722           | <i>HLA-B-MICA</i>   | 0.721          | 0.221               | 0.098                  | 4.64E-07 | 2.609 | (1.78 - 3.83) | 0.003119                              | 0.2324                                |
| rs115341260 (T)         | 31352880           | <i>HLA-B-MICA</i>   | 0.728          | 0.224               | 0.097                  | 1.87E-07 | 2.677 | (1.83 - 3.92) | 0.003205                              | 0.2491                                |
| rs114542835 (G)         | 31353417           | <i>HLA-B-MICA</i>   | 0.723          | 0.226               | 0.097                  | 9.28E-08 | 2.723 | (1.86 - 3.98) | 0.002419                              | 0.2333                                |
| rs12524487 (T)          | 31354238           | <i>HLA-B-MICA</i>   | 1.000          | 0.217               | 0.067                  | 4.05E-12 | 3.850 | (2.57 - 5.76) | N/A                                   | N/A                                   |
| chr6:31359160:D (Indel) | 31359160           | <i>HLA-B-MICA</i>   | 0.909          | 0.226               | 0.076                  | 2.15E-10 | 3.560 | (2.36 - 5.37) | 0.1461                                | 0.88                                  |

|                         |          |                   |       |       |       |          |       |               |          |          |
|-------------------------|----------|-------------------|-------|-------|-------|----------|-------|---------------|----------|----------|
| chr6:31359428:D (Indel) | 31359428 | <i>HLA-B-MICA</i> | 1.000 | 0.209 | 0.062 | 5.83E-12 | 3.965 | (2.62 - 6.01) | N/A      | N/A      |
| rs141706050 (A)         | 31359449 | <i>HLA-B-MICA</i> | 1.000 | 0.209 | 0.062 | 5.83E-12 | 3.965 | (2.62 - 6.01) | N/A      | N/A      |
| rs147293721 (A)         | 31366295 | <i>HLA-B-MICA</i> | 0.822 | 0.156 | 0.063 | 3.54E-06 | 2.760 | (1.77 - 4.30) | 3.32E-08 | 0.001118 |
| rs3763288 (A)           | 31370367 | <i>MICA</i>       | 0.790 | 0.148 | 0.058 | 4.66E-06 | 2.803 | (1.78 - 4.43) | 2.81E-08 | 0.004013 |
| rs114202986 (C)         | 31375917 | <i>MICA</i>       | 0.813 | 0.156 | 0.062 | 2.56E-06 | 2.803 | (1.80 - 4.38) | 3.54E-08 | 0.002061 |
| rs9380254 (C)           | 31378335 | <i>MICA</i>       | 0.783 | 0.136 | 0.057 | 5.09E-05 | 2.579 | (1.61 - 4.14) | 2.65E-08 | 0.002191 |
| rs114910971 (T)         | 31380897 | <i>MICA</i>       | 0.809 | 0.156 | 0.059 | 1.07E-06 | 2.924 | (1.87 - 4.58) | 3.58E-08 | 0.00264  |
| rs116423065 (T)         | 31416990 | <i>MICA-HCP5</i>  | 0.802 | 0.149 | 0.055 | 1.16E-06 | 3.013 | (1.90 - 4.79) | 6.20E-08 | 0.005319 |
| rs3128984 (G)           | 31424528 | <i>MICA-HCP5</i>  | 0.729 | 0.150 | 0.060 | 1.42E-05 | 2.746 | (1.71 - 4.40) | 1.14E-08 | 0.002209 |
| rs115451618 (G)         | 31426399 | <i>MICA-HCP5</i>  | 0.801 | 0.149 | 0.054 | 7.99E-07 | 3.068 | (1.93 - 4.88) | 6.08E-08 | 0.005804 |

---

N/A, conditional analysis not possible due to high linkage disequilibrium.



**Table S5: Classical HLA allele association results in Takayasu's arteritis. Only alleles with a frequency of at least 1% were analyzed.**

| Allele            | Turkish            |                       |          |       |             | European-American  |                       |         |       |             | Meta-Analysis |       |                     |
|-------------------|--------------------|-----------------------|----------|-------|-------------|--------------------|-----------------------|---------|-------|-------------|---------------|-------|---------------------|
|                   | AF <sub>Case</sub> | AF <sub>Control</sub> | P        | OR    | CI95%       | AF <sub>Case</sub> | AF <sub>Control</sub> | P       | OR    | CI95%       | P             | OR    | Q<br>Statistic<br>P |
| <i>HLA-A*0101</i> | 0.103              | 0.136                 | 0.088    | 0.725 | (0.50-1.05) | 0.116              | 0.170                 | 0.083   | 0.640 | (0.39-1.06) | 0.017         | 0.694 | 0.698               |
| <i>HLA-A*1101</i> | 0.087              | 0.093                 | 0.755    | 0.937 | (0.62-1.41) | 0.043              | 0.071                 | 0.187   | 0.588 | (0.26-1.31) | 0.381         | 0.849 | 0.309               |
| <i>HLA-A*0201</i> | 0.238              | 0.198                 | 0.104    | 1.265 | (0.95-1.68) | 0.378              | 0.291                 | 0.025   | 1.484 | (1.05-2.10) | 0.007         | 1.349 | 0.484               |
| <i>HLA-A*0205</i> | 0.009              | 0.024                 | 0.057    | 0.360 | (0.12-1.08) | 0.012              | 0.011                 | 0.864   | 1.143 | (0.25-5.27) | 0.166         | 0.533 | 0.229               |
| <i>HLA-A*2301</i> | 0.022              | 0.028                 | 0.509    | 0.772 | (0.36-1.67) | 0.018              | 0.020                 | 0.866   | 0.899 | (0.26-3.07) | 0.517         | 0.806 | 0.837               |
| <i>HLA-A*2402</i> | 0.155              | 0.156                 | 0.968    | 0.993 | (0.72-1.37) | 0.073              | 0.093                 | 0.414   | 0.770 | (0.41-1.44) | 0.682         | 0.942 | 0.481               |
| <i>HLA-A*2902</i> | 0.026              | 0.028                 | 0.847    | 0.931 | (0.45-1.92) | 0.043              | 0.038                 | 0.797   | 1.115 | (0.49-2.55) | 0.980         | 1.007 | 0.748               |
| <i>HLA-A*3001</i> | 0.068              | 0.027                 | 0.000714 | 2.648 | (1.48-4.75) | 0.006              | 0.011                 | 0.586   | 0.568 | (0.07-4.47) | 0.003         | 2.362 | 0.159               |
| <i>HLA-A*0301</i> | 0.090              | 0.131                 | 0.031    | 0.654 | (0.44-0.96) | 0.189              | 0.164                 | 0.419   | 1.193 | (0.78-1.83) | 0.297         | 0.858 | 0.042               |
| <i>HLA-A*0302</i> | 0.004              | 0.017                 | 0.055    | 0.256 | (0.06-1.15) | N/A                | N/A                   | N/A     | N/A   | N/A         | N/A           | N/A   | N/A                 |
| <i>HLA-A*3101</i> | 0.017              | 0.018                 | 0.921    | 0.956 | (0.39-2.33) | 0.018              | 0.042                 | 0.150   | 0.429 | (0.13-1.40) | 0.358         | 0.716 | 0.289               |
| <i>HLA-A*3201</i> | 0.057              | 0.035                 | 0.077    | 1.654 | (0.94-2.90) | 0.030              | 0.024                 | 0.594   | 1.306 | (0.49-3.50) | 0.074         | 1.561 | 0.683               |
| <i>HLA-A*6801</i> | 0.063              | 0.053                 | 0.475    | 1.199 | (0.73-1.97) | 0.030              | 0.033                 | 0.861   | 0.918 | (0.35-2.40) | 0.580         | 1.133 | 0.628               |
| <i>HLA-B*1302</i> | 0.116              | 0.041                 | 1.50E-05 | 3.100 | (1.82-5.29) | 0.063              | 0.020                 | 0.002   | 3.382 | (1.52-7.53) | 3.25E-07      | 3.184 | 0.859               |
| <i>HLA-B*1401</i> | N/A                | N/A                   | N/A      | N/A   | N/A         | 0.013              | 0.020                 | 0.553   | 0.642 | (0.15-2.81) | N/A           | N/A   | N/A                 |
| <i>HLA-B*1402</i> | 0.024              | 0.012                 | 0.194    | 1.948 | (0.70-5.42) | 0.038              | 0.022                 | 0.228   | 1.764 | (0.69-4.49) | 0.0818        | 1.845 | 0.888               |
| <i>HLA-B*1501</i> | 0.027              | 0.016                 | 0.258    | 1.703 | (0.67-4.33) | 0.127              | 0.050                 | 0.00021 | 2.781 | (1.59-4.87) | 0.00027       | 2.442 | 0.378               |
| <i>HLA-B*1517</i> | 0.012              | 0.014                 | 0.778    | 0.840 | (0.25-2.81) | N/A                | N/A                   | N/A     | N/A   | N/A         | N/A           | N/A   | N/A                 |
| <i>HLA-B*1801</i> | 0.054              | 0.106                 | 0.007    | 0.477 | (0.28-0.82) | 0.044              | 0.047                 | 0.873   | 0.935 | (0.41-2.12) | 0.021         | 0.587 | 0.181               |
| <i>HLA-B*2705</i> | 0.015              | 0.034                 | 0.092    | 0.435 | (0.16-1.18) | 0.025              | 0.028                 | 0.869   | 0.913 | (0.31-2.67) | 0.188         | 0.613 | 0.320               |
| <i>HLA-B*3501</i> | 0.033              | 0.055                 | 0.129    | 0.584 | (0.29-1.18) | 0.032              | 0.050                 | 0.327   | 0.627 | (0.24-1.61) | 0.074         | 0.599 | 0.906               |
| <i>HLA-B*3502</i> | 0.024              | 0.028                 | 0.688    | 0.838 | (0.35-1.98) | N/A                | N/A                   | N/A     | N/A   | N/A         | N/A           | N/A   | N/A                 |
| <i>HLA-B*3503</i> | 0.045              | 0.044                 | 0.973    | 1.011 | (0.53-1.95) | 0.025              | 0.018                 | 0.565   | 1.383 | (0.46-4.19) | 0.749         | 1.096 | 0.634               |
| <i>HLA-B*3701</i> | 0.009              | 0.016                 | 0.377    | 0.558 | (0.15-2.07) | 0.019              | 0.012                 | 0.440   | 1.661 | (0.45-6.10) | 0.944         | 0.967 | 0.247               |

|                    |       |       |          |       |             |       |       |          |        |             |          |       |       |
|--------------------|-------|-------|----------|-------|-------------|-------|-------|----------|--------|-------------|----------|-------|-------|
| <i>HLA-B*3801</i>  | 0.009 | 0.041 | 0.00593  | 0.213 | (0.06-0.71) | 0.038 | 0.006 | 0.0003   | 6.813  | (2.05-22.6) | 0.642    | 1.224 | 0.000 |
| <i>HLA-B*4001</i>  | 0.033 | 0.021 | 0.288    | 1.563 | (0.68-3.58) | 0.044 | 0.067 | 0.285    | 0.647  | (0.29-1.45) | 0.978    | 0.992 | 0.135 |
| <i>HLA-B*4002</i>  | 0.027 | 0.018 | 0.357    | 1.530 | (0.62-3.81) | 0.019 | 0.016 | 0.796    | 1.181  | (0.34-4.16) | 0.372    | 1.400 | 0.744 |
| <i>HLA-B*4101</i>  | 0.036 | 0.021 | 0.190    | 1.710 | (0.76-3.85) | N/A   | N/A   | N/A      | N/A    | N/A         | N/A      | N/A   | N/A   |
| <i>HLA-B*4402</i>  | 0.042 | 0.051 | 0.514    | 0.805 | (0.42-1.55) | 0.044 | 0.098 | 0.030    | 0.427  | (0.19-0.94) | 0.065    | 0.623 | 0.225 |
| <i>HLA-B*4403</i>  | 0.033 | 0.027 | 0.588    | 1.243 | (0.56-2.74) | 0.070 | 0.059 | 0.598    | 1.199  | (0.61-2.35) | 0.453    | 1.217 | 0.946 |
| <i>HLA-B*4901</i>  | 0.042 | 0.051 | 0.514    | 0.805 | (0.42-1.55) | 0.006 | 0.014 | 0.438    | 0.454  | (0.06-3.52) | 0.395    | 0.764 | 0.602 |
| <i>HLA-B*5001</i>  | 0.033 | 0.035 | 0.836    | 0.924 | (0.44-1.95) | N/A   | N/A   | N/A      | N/A    | N/A         | N/A      | N/A   | N/A   |
| <i>HLA-B*5101</i>  | 0.122 | 0.134 | 0.597    | 0.896 | (0.60-1.35) | 0.044 | 0.052 | 0.691    | 0.848  | (0.38-1.92) | 0.515    | 0.886 | 0.905 |
| <i>HLA-B*5201</i>  | 0.116 | 0.034 | 1.04E-06 | 3.780 | (2.15-6.66) | 0.063 | 0.006 | 3.00E-08 | 11.660 | (3.93-34.6) | 8.98E-10 | 4.806 | 0.072 |
| <i>HLA-B*5501</i>  | 0.018 | 0.018 | 0.983    | 1.011 | (0.36-2.81) | 0.006 | 0.016 | 0.345    | 0.389  | (0.05-2.98) | 0.697    | 0.834 | 0.411 |
| <i>HLA-B*5601</i>  | 0.009 | 0.012 | 0.633    | 0.719 | (0.18-2.80) | N/A   | N/A   | N/A      | N/A    | N/A         | N/A      | N/A   | N/A   |
| <i>HLA-B*5701</i>  | 0.024 | 0.025 | 0.931    | 0.962 | (0.40-2.32) | 0.025 | 0.036 | 0.508    | 0.701  | (0.24-2.02) | 0.625    | 0.845 | 0.652 |
| <i>HLA-B*5801</i>  | 0.015 | 0.016 | 0.905    | 0.935 | (0.31-2.81) | N/A   | N/A   | N/A      | N/A    | N/A         | N/A      | N/A   | N/A   |
| <i>HLA-B*0702</i>  | 0.036 | 0.037 | 0.915    | 0.961 | (0.47-1.98) | 0.120 | 0.169 | 0.123    | 0.670  | (0.40-1.12) | 0.189    | 0.756 | 0.425 |
| <i>HLA-B*0801</i>  | 0.003 | 0.039 | 0.00095  | 0.074 | (0.01-0.55) | 0.063 | 0.134 | 0.013    | 0.438  | (0.22-0.86) | 0.001957 | 0.367 | 0.099 |
| <i>HLA-Cw*0102</i> | 0.031 | 0.045 | 0.202    | 0.679 | (0.37-1.23) | 0.026 | 0.040 | 0.319    | 0.622  | (0.24-1.60) | 0.109    | 0.662 | 0.877 |
| <i>HLA-Cw*1202</i> | 0.090 | 0.026 | 2.05E-07 | 3.737 | (2.20-6.34) | 0.051 | 0.006 | 6.20E-07 | 8.817  | (3.17-24.6) | 4.01E-10 | 4.476 | 0.144 |
| <i>HLA-Cw*1203</i> | 0.098 | 0.132 | 0.057    | 0.710 | (0.50-1.01) | 0.082 | 0.031 | 0.00097  | 2.750  | (1.47-5.13) | 0.941    | 0.988 | 0.000 |
| <i>HLA-Cw*1402</i> | 0.031 | 0.044 | 0.239    | 0.699 | (0.38-1.27) | N/A   | N/A   | N/A      | N/A    | N/A         | N/A      | N/A   | N/A   |
| <i>HLA-Cw*1502</i> | 0.061 | 0.061 | 0.957    | 0.987 | (0.62-1.57) | 0.015 | 0.027 | 0.330    | 0.554  | (0.17-1.85) | 0.693    | 0.917 | 0.380 |
| <i>HLA-Cw*1505</i> | 0.027 | 0.010 | 0.015    | 2.839 | (1.18-6.82) | N/A   | N/A   | N/A      | N/A    | N/A         | N/A      | N/A   | N/A   |
| <i>HLA-Cw*1601</i> | 0.025 | 0.021 | 0.587    | 1.224 | (0.59-2.54) | 0.036 | 0.048 | 0.437    | 0.727  | (0.32-1.63) | 0.907    | 0.968 | 0.349 |
| <i>HLA-Cw*1602</i> | 0.008 | 0.025 | 0.026    | 0.313 | (0.11-0.92) | N/A   | N/A   | N/A      | N/A    | N/A         | N/A      | N/A   | N/A   |
| <i>HLA-Cw*1701</i> | 0.021 | 0.018 | 0.691    | 1.172 | (0.53-2.57) | 0.005 | 0.012 | 0.389    | 0.418  | (0.05-3.23) | 0.944    | 1.027 | 0.357 |
| <i>HLA-Cw*0202</i> | 0.027 | 0.045 | 0.097    | 0.592 | (0.32-1.11) | 0.046 | 0.051 | 0.787    | 0.905  | (0.44-1.87) | 0.155    | 0.709 | 0.386 |
| <i>HLA-Cw*0303</i> | 0.027 | 0.027 | 0.967    | 1.015 | (0.51-2.00) | 0.082 | 0.044 | 0.030    | 1.911  | (1.06-3.46) | 0.102    | 1.453 | 0.169 |
| <i>HLA-Cw*0304</i> | 0.037 | 0.022 | 0.105    | 1.709 | (0.89-3.29) | 0.138 | 0.091 | 0.044    | 1.598  | (1.01-2.53) | 0.011    | 1.634 | 0.869 |
| <i>HLA-Cw*0401</i> | 0.176 | 0.174 | 0.934    | 1.012 | (0.76-1.35) | 0.107 | 0.104 | 0.897    | 1.033  | (0.63-1.70) | 0.893    | 1.017 | 0.944 |
| <i>HLA-Cw*0501</i> | 0.027 | 0.016 | 0.152    | 1.736 | (0.81-3.73) | 0.026 | 0.073 | 0.014    | 0.334  | (0.13-0.84) | 0.687    | 0.886 | 0.007 |
| <i>HLA-Cw*0602</i> | 0.162 | 0.114 | 0.012    | 1.504 | (1.09-2.07) | 0.107 | 0.081 | 0.228    | 1.365  | (0.82-2.27) | 0.00574  | 1.463 | 0.751 |

|                      |       |       |          |       |             |       |       |          |        |             |          |       |       |
|----------------------|-------|-------|----------|-------|-------------|-------|-------|----------|--------|-------------|----------|-------|-------|
| <i>HLA-Cw*0701</i>   | 0.068 | 0.129 | 0.00049  | 0.497 | (0.33-0.74) | 0.077 | 0.168 | 0.0012   | 0.411  | (0.24-0.71) | 3.74E-06 | 0.466 | 0.587 |
| <i>HLA-Cw*0702</i>   | 0.057 | 0.059 | 0.868    | 0.961 | (0.60-1.54) | 0.117 | 0.154 | 0.192    | 0.733  | (0.46-1.17) | 0.297    | 0.838 | 0.427 |
| <i>HLA-Cw*0704</i>   | N/A   | N/A   | N/A      | N/A   | N/A         | 0.010 | 0.017 | 0.478    | 0.590  | (0.14-2.58) | N/A      | N/A   | N/A   |
| <i>HLA-Cw*0802</i>   | 0.014 | 0.012 | 0.823    | 1.117 | (0.42-2.95) | 0.041 | 0.040 | 0.979    | 1.011  | (0.47-2.19) | 0.872    | 1.051 | 0.875 |
| <i>HLA-DQA1*0101</i> | 0.164 | 0.136 | 0.152    | 1.244 | (0.92-1.68) | 0.131 | 0.137 | 0.844    | 0.956  | (0.61-1.50) | 0.279    | 1.148 | 0.339 |
| <i>HLA-DQA1*0102</i> | 0.185 | 0.131 | 0.006    | 1.507 | (1.12-2.02) | 0.182 | 0.203 | 0.488    | 0.871  | (0.59-1.29) | 0.075    | 1.238 | 0.028 |
| <i>HLA-DQA1*0103</i> | 0.105 | 0.101 | 0.841    | 1.037 | (0.73-1.48) | 0.101 | 0.074 | 0.190    | 1.413  | (0.84-2.37) | 0.367    | 1.144 | 0.334 |
| <i>HLA-DQA1*0201</i> | 0.149 | 0.082 | 7.01E-05 | 1.969 | (1.40-2.76) | 0.136 | 0.136 | 0.976    | 1.007  | (0.65-1.57) | 0.002    | 1.539 | 0.019 |
| <i>HLA-DQA1*0301</i> | 0.118 | 0.152 | 0.067    | 0.742 | (0.54-1.02) | 0.273 | 0.177 | 0.0017   | 1.746  | (1.23-2.48) | 0.458    | 1.094 | 0.000 |
| <i>HLA-DQA1*0401</i> | 0.017 | 0.024 | 0.370    | 0.699 | (0.32-1.54) | 0.025 | 0.034 | 0.510    | 0.728  | (0.28-1.88) | 0.269    | 0.710 | 0.949 |
| <i>HLA-DQB1*0201</i> | 0.090 | 0.108 | 0.315    | 0.821 | (0.56-1.21) | 0.064 | 0.151 | 0.0038   | 0.385  | (0.20-0.75) | 0.023    | 0.680 | 0.055 |
| <i>HLA-DQB1*0202</i> | 0.049 | 0.031 | 0.097    | 1.617 | (0.91-2.87) | 0.019 | 0.019 | 0.994    | 0.995  | (0.29-3.46) | 0.136    | 1.486 | 0.488 |
| <i>HLA-DQB1*0301</i> | 0.223 | 0.315 | 0.00044  | 0.626 | (0.48-0.81) | 0.199 | 0.187 | 0.736    | 1.077  | (0.70-1.66) | 0.005    | 0.725 | 0.035 |
| <i>HLA-DQB1*0302</i> | 0.114 | 0.105 | 0.637    | 1.091 | (0.76-1.57) | 0.250 | 0.109 | 1.61E-06 | 2.733  | (1.79-4.17) | 0.001    | 1.607 | 0.001 |
| <i>HLA-DQB1*0303</i> | 0.030 | 0.028 | 0.792    | 1.095 | (0.56-2.15) | 0.019 | 0.045 | 0.140    | 0.419  | (0.13-1.38) | 0.633    | 0.867 | 0.169 |
| <i>HLA-DQB1*0402</i> | 0.017 | 0.030 | 0.161    | 0.567 | (0.25-1.27) | 0.019 | 0.035 | 0.308    | 0.540  | (0.16-1.80) | 0.087    | 0.558 | 0.948 |
| <i>HLA-DQB1*0501</i> | 0.084 | 0.077 | 0.647    | 1.102 | (0.73-1.67) | 0.115 | 0.135 | 0.501    | 0.834  | (0.49-1.42) | 0.957    | 0.991 | 0.417 |
| <i>HLA-DQB1*0502</i> | 0.137 | 0.059 | 1.32E-06 | 2.557 | (1.73-3.78) | N/A   | N/A   | N/A      | N/A    | N/A         | N/A      | N/A   | N/A   |
| <i>HLA-DQB1*0503</i> | 0.062 | 0.063 | 0.934    | 0.980 | (0.61-1.57) | 0.026 | 0.017 | 0.455    | 1.530  | (0.50-4.71) | 0.835    | 1.047 | 0.474 |
| <i>HLA-DQB1*0601</i> | 0.067 | 0.039 | 0.030    | 1.734 | (1.05-2.87) | 0.045 | 0.010 | 0.00099  | 4.815  | (1.72-13.5) | 0.0012   | 2.113 | 0.081 |
| <i>HLA-DQB1*0602</i> | 0.043 | 0.037 | 0.603    | 1.164 | (0.66-2.07) | 0.141 | 0.164 | 0.469    | 0.835  | (0.51-1.36) | 0.829    | 0.960 | 0.388 |
| <i>HLA-DQB1*0603</i> | 0.052 | 0.065 | 0.340    | 0.786 | (0.48-1.29) | 0.064 | 0.065 | 0.959    | 0.982  | (0.49-1.97) | 0.420    | 0.847 | 0.611 |
| <i>HLA-DQB1*0604</i> | 0.026 | 0.030 | 0.666    | 0.857 | (0.43-1.72) | 0.026 | 0.042 | 0.329    | 0.596  | (0.21-1.70) | 0.371    | 0.767 | 0.572 |
| <i>HLA-DQB1*0609</i> | N/A   | N/A   | N/A      | N/A   | N/A         | 0.006 | 0.011 | 0.611    | 0.587  | (0.07-4.67) | N/A      | N/A   | N/A   |
| <i>HLA-DRB1*0101</i> | 0.034 | 0.048 | 0.366    | 0.710 | (0.34-1.50) | 0.065 | 0.078 | 0.612    | 0.8199 | (0.38-1.77) | 0.318    | 0.761 | 0.793 |
| <i>HLA-DRB1*0102</i> | 0.022 | 0.018 | 0.718    | 1.208 | (0.43-3.37) | 0.032 | 0.010 | 0.048    | 3.281  | (0.95-11.4) | 0.142    | 1.809 | 0.224 |
| <i>HLA-DRB1*0301</i> | 0.094 | 0.134 | 0.088    | 0.668 | (0.42-1.06) | 0.081 | 0.160 | 0.023    | 0.4623 | (0.23-0.91) | 0.008    | 0.594 | 0.380 |
| <i>HLA-DRB1*0401</i> | N/A   | N/A   | N/A      | N/A   | N/A         | 0.048 | 0.062 | 0.562    | 0.7722 | (0.32-1.86) | N/A      | N/A   | N/A   |
| <i>HLA-DRB1*0402</i> | 0.013 | 0.014 | 0.892    | 0.916 | (0.26-3.27) | N/A   | N/A   | N/A      | N/A    | N/A         | N/A      | N/A   | N/A   |
| <i>HLA-DRB1*0403</i> | N/A   | N/A   | N/A      | N/A   | N/A         | 0.024 | 0.016 | 0.507    | 1.544  | (0.42-5.62) | N/A      | N/A   | N/A   |
| <i>HLA-DRB1*0404</i> | 0.028 | 0.025 | 0.791    | 1.129 | (0.46-2.76) | 0.024 | 0.024 | 0.988    | 0.9903 | (0.29-3.43) | 0.836    | 1.080 | 0.867 |

|                      |       |       |       |        |             |       |       |          |        |             |           |       |       |
|----------------------|-------|-------|-------|--------|-------------|-------|-------|----------|--------|-------------|-----------|-------|-------|
| <i>HLA-DRB1*0405</i> | 0.025 | 0.002 | 0.004 | 11.260 | (1.40-90.5) | N/A   | N/A   | N/A      | N/A    | N/A         | N/A       | N/A   | N/A   |
| <i>HLA-DRB1*0701</i> | 0.194 | 0.123 | 0.007 | 1.718  | (1.15-2.56) | 0.186 | 0.154 | 0.373    | 1.254  | (0.76-2.06) | 0.008     | 1.520 | 0.333 |
| <i>HLA-DRB1*0801</i> | N/A   | N/A   | N/A   | N/A    | N/A         | 0.016 | 0.026 | 0.517    | 0.6175 | (0.14-2.70) | N/A       | N/A   | N/A   |
| <i>HLA-DRB1*0803</i> | 0.006 | 0.014 | 0.325 | 0.455  | (0.09-2.27) | N/A   | N/A   | N/A      | N/A    | N/A         | N/A       | N/A   | N/A   |
| <i>HLA-DRB1*0901</i> | N/A   | N/A   | N/A   | N/A    | N/A         | 0.016 | 0.010 | 0.550    | 1.614  | (0.33-7.86) | N/A       | N/A   | N/A   |
| <i>HLA-DRB1*1001</i> | 0.038 | 0.023 | 0.230 | 1.675  | (0.71-3.93) | 0.024 | 0.010 | 0.186    | 2.44   | (0.62-9.57) | 0.092     | 1.861 | 0.647 |
| <i>HLA-DRB1*1101</i> | 0.025 | 0.057 | 0.034 | 0.426  | (0.19-0.96) | 0.024 | 0.023 | 0.935    | 1.054  | (0.30-3.67) | 0.091     | 0.557 | 0.232 |
| <i>HLA-DRB1*1104</i> | 0.041 | 0.059 | 0.255 | 0.674  | (0.34-1.33) | N/A   | N/A   | N/A      | N/A    | N/A         | N/A       | N/A   | N/A   |
| <i>HLA-DRB1*1201</i> | 0.009 | 0.016 | 0.435 | 0.585  | (0.15-2.28) | N/A   | N/A   | N/A      | N/A    | N/A         | N/A       | N/A   | N/A   |
| <i>HLA-DRB1*1301</i> | 0.047 | 0.080 | 0.073 | 0.569  | (0.31-1.06) | 0.097 | 0.072 | 0.333    | 1.384  | 0.71-2.68)  | 0.528     | 0.864 | 0.055 |
| <i>HLA-DRB1*1302</i> | 0.050 | 0.089 | 0.042 | 0.541  | (0.30-0.99) | 0.032 | 0.062 | 0.193    | 0.5062 | (0.18-1.44) | 0.018     | 0.532 | 0.913 |
| <i>HLA-DRB1*1303</i> | 0.006 | 0.023 | 0.072 | 0.270  | (0.06-1.24) | 0.016 | 0.016 | 0.979    | 1.021  | (0.22-4.66) | 0.243     | 0.527 | 0.226 |
| <i>HLA-DRB1*1401</i> | 0.059 | 0.077 | 0.339 | 0.754  | (0.42-1.35) | 0.016 | 0.017 | 0.930    | 0.9344 | (0.21-4.23) | 0.357     | 0.775 | 0.795 |
| <i>HLA-DRB1*1501</i> | 0.072 | 0.045 | 0.120 | 1.626  | (0.88-3.02) | 0.161 | 0.185 | 0.522    | 0.8453 | (0.50-1.42) | 0.618     | 1.106 | 0.111 |
| <i>HLA-DRB1*1502</i> | 0.081 | 0.036 | 0.007 | 2.344  | (1.24-4.45) | 0.056 | 0.009 | 8.55E-05 | 6.88   | (2.27-20.8) | 0.0000735 | 3.069 | 0.099 |
| <i>HLA-DRB1*1601</i> | 0.106 | 0.073 | 0.105 | 1.516  | (0.91-2.51) | 0.032 | 0.013 | 0.112    | 2.544  | (0.77-8.39) | 0.037     | 1.640 | 0.434 |

AF, allele frequency; OR, odds ratio, CI, confidence interval

**Table S6: Conditional regression analysis between rs12524487 in the *HLA-B/MICA* locus and the classical HLA alleles which are associated with Takayasu's arteritis in this study.**

| Marker             | Covariate          | Turkish             |       | European-American   |          | Meta-Analysis |            |               |
|--------------------|--------------------|---------------------|-------|---------------------|----------|---------------|------------|---------------|
|                    |                    | OR (CI95%)          | P     | OR (CI95%)          | P        | OR            | $P_{meta}$ | Q statistic P |
| rs12524487         | <i>HLA-B*5201</i>  | 2.262 (0.96 - 5.32) | 0.061 | 3.135 (1.75 - 5.61) | 0.00012  | 2.93          | 2.09E-07   | 0.501         |
| <i>HLA-B*5201</i>  | rs12524487         | 1.798 (0.70 - 4.63) | 0.224 | 4.873 (1.48 - 16.0) | 0.0091   | 2.65          | 0.01       | 0.199         |
| rs12524487         | <i>HLA-Cw*1202</i> | 1.570 (0.74 - 3.31) | 0.236 | 3.158 (1.99 - 5.01) | 1.01E-06 | 2.60          | 1.73E-06   | 0.118         |
| <i>HLA-Cw*1202</i> | rs12524487         | 2.481 (1.09 - 5.66) | 0.031 | 4.450 (1.50 - 13.2) | 0.0072   | 3.07          | 0.00083    | 0.402         |

**Table S7: Genetic association results for variants in linkage disequilibrium ( $r^2>0.7$ ) with chr21:40462378:D in the chromosome 21q22 locus.**

| SNP<br>(Minor allele)       | Position<br>(HG19) | Turkish             |                        |       |             |          | European-American   |                        |       |             |          | Meta-Analysis |                   | Q<br>statistic<br>P |
|-----------------------------|--------------------|---------------------|------------------------|-------|-------------|----------|---------------------|------------------------|-------|-------------|----------|---------------|-------------------|---------------------|
|                             |                    | MAF <sub>Case</sub> | MAF <sub>Control</sub> | OR    | 95% CI      | P        | MAF <sub>Case</sub> | MAF <sub>Control</sub> | OR    | 95% CI      | P        | OR            | P <sub>meta</sub> |                     |
| rs28756733<br>(G)           | 40458722           | 0.298               | 0.376                  | 0.707 | (0.57-0.88) | 0.001713 | 0.189               | 0.332                  | 0.468 | (0.32-0.68) | 3.61E-05 | 0.635         | 1.92E-06          | 0.058               |
| rs13048321<br>(T)           | 40459092           | 0.298               | 0.377                  | 0.703 | (0.57-0.87) | 0.001433 | 0.191               | 0.335                  | 0.468 | (0.32-0.68) | 3.59E-05 | 0.633         | 1.53E-06          | 0.061               |
| rs13048533<br>(A)           | 40459094           | 0.297               | 0.375                  | 0.702 | (0.57-0.87) | 0.00141  | 0.193               | 0.334                  | 0.479 | (0.33-0.68) | 5.37E-05 | 0.635         | 1.81E-06          | 0.076               |
| rs35819975<br>(C)           | 40459532           | 0.294               | 0.378                  | 0.688 | (0.55-0.86) | 0.000742 | 0.193               | 0.335                  | 0.477 | (0.33-0.69) | 4.93E-05 | 0.624         | 7.75E-07          | 0.090               |
| rs2094871<br>(A)            | 40460859           | 0.295               | 0.376                  | 0.696 | (0.56-0.87) | 0.001068 | 0.193               | 0.337                  | 0.472 | (0.33-0.68) | 3.70E-05 | 0.628         | 1.03E-06          | 0.072               |
| rs9982724<br>(A)            | 40461378           | 0.297               | 0.377                  | 0.699 | (0.56-0.87) | 0.001211 | 0.193               | 0.336                  | 0.474 | (0.33-0.68) | 4.24E-05 | 0.631         | 1.30E-06          | 0.073               |
| chr21:40462378:D<br>(indel) | 40462378           | 0.296               | 0.382                  | 0.680 | (0.55-0.85) | 0.000566 | 0.192               | 0.339                  | 0.465 | (0.32-0.67) | 3.18E-05 | 0.616         | 4.39E-07          | 0.081               |
| chr21:40462613:l<br>(indel) | 40462613           | 0.298               | 0.375                  | 0.707 | (0.57-0.88) | 0.001781 | 0.191               | 0.337                  | 0.464 | (0.32-0.67) | 2.85E-05 | 0.633         | 1.74E-06          | 0.053               |
| rs2242944<br>(A)            | 40465178           | 0.316               | 0.390                  | 0.723 | (0.58-0.90) | 0.002949 | 0.203               | 0.356                  | 0.461 | (0.32-0.66) | 1.52E-05 | 0.642         | 2.27E-06          | 0.034               |
| rs2836880<br>(C)            | 40466239           | 0.315               | 0.388                  | 0.725 | (0.59-0.90) | 0.003297 | 0.203               | 0.360                  | 0.453 | (0.32-0.65) | 9.38E-06 | 0.640         | 1.98E-06          | 0.027               |
| rs2242945<br>(G)            | 40467423           | 0.338               | 0.410                  | 0.734 | (0.59-0.91) | 0.004044 | 0.226               | 0.369                  | 0.500 | (0.65-0.71) | 6.37E-05 | 0.661         | 6.46E-06          | 0.063               |

**Table S8: Genetic association results for variants in linkage disequilibrium ( $r^2 > 0.7$ ) with rs56167332 in the *IL12B* locus on chromosome 5 in the Turkish cohort.**

| SNP<br>(Minor allele) | Position<br>(HG19) | R2    | MAF <sub>Cases</sub> | MAF <sub>Controls</sub> | <i>P</i> | OR    | 95% CI    | <i>P</i> rs56167332<br>independent of<br>SNP | <i>P</i> SNP<br>independent of<br>rs56167332 |
|-----------------------|--------------------|-------|----------------------|-------------------------|----------|-------|-----------|----------------------------------------------|----------------------------------------------|
| rs6871626 (A)         | 158826792          | 0.982 | 0.434                | 0.333                   | 5.27E-05 | 1.536 | 1.25-1.89 | NA                                           | NA                                           |
| rs56167332 (A)        | 158827769          | 1.000 | 0.441                | 0.332                   | 1.41E-05 | 1.585 | 1.29-1.95 | NA                                           | NA                                           |
| rs755374 (T)          | 158829294          | 0.960 | 0.425                | 0.328                   | 0.00011  | 1.511 | 1.23-1.86 | 0.0141                                       | 0.0903                                       |
| rs4921492 (A)         | 158832277          | 0.851 | 0.436                | 0.346                   | 0.00032  | 1.463 | 1.19-1.80 | 0.0192                                       | 0.409                                        |
| rs12374547 (A)        | 158833535          | 0.778 | 0.426                | 0.345                   | 0.00155  | 1.411 | 1.14-1.75 | 0.0139                                       | 0.465                                        |
| rs60689680 (T)        | 158834367          | 0.710 | 0.426                | 0.349                   | 0.00204  | 1.387 | 1.13-1.71 | 0.0028                                       | 0.359                                        |
| rs4921493 (C)         | 158836107          | 0.716 | 0.426                | 0.346                   | 0.00183  | 1.399 | 1.13-1.73 | 0.0035                                       | 0.386                                        |

**Table S9: Results of the meta-analysis for the three variants in the *IL12B* locus which are associated with Takayasu's arteritis in both the Turkish and the European-American cohorts.**

| SNP<br>(Minor allele) | Position<br>(HG19) | <i>P</i> | OR    | Q statistic <i>P</i> |
|-----------------------|--------------------|----------|-------|----------------------|
| rs6871626 (A)         | 158826792          | 7.31E-06 | 1.479 | 0.533                |
| rs56167332 (A)        | 158827769          | 1.88E-06 | 1.515 | 0.460                |
| rs755374 (T)          | 158829294          | 1.48E-05 | 1.461 | 0.583                |
